# Supplementary material for: The Berlin Multi-Facet Personality Inventory
Source: Atypon-hosted journal article supplement (doi:10.1027/2698-1866/a000021), 2022-04-01

# Search for scale redundancy

- According to:
  - Rosenbusch, H., Wanders, F., & Pit, I. L. (2020). The Semantic Scale Network: An online tool to detect semantic overlap of psychological scales and prevent scale redundancies. *Psychological Methods*, 25(3), 380–392.
- Website
  - [https://rosenbusch.shinyapps.io/semantic\\_net/](https://rosenbusch.shinyapps.io/semantic_net/)
- Procedure
  - Items were uploaded scale wise
  - Similarity was checked with focus on IPIP
  - Comparison of item content from IPIP with current scale and renaming if match

# Appreciation

| Scales                                   | Similarity | Look up here                                                                                                                                                                             |
|------------------------------------------|------------|------------------------------------------------------------------------------------------------------------------------------------------------------------------------------------------|
| justice (interactional)                  | 0.69       | Bruner, G. C. (2012). Marketing Scales Handbook : A Compilation of Multi-Iter Measures for Consumer Behavior & Advertising Research, Volume 6. Fort Worth, Texas: GCBII Productions, LLC |
| interactional justice                    | 0.591      | Jones, David A. (2005), The Effects of Overhearing Peers Discuss an Authority's Fairness Reputation on Reactions to Subsequent Treatment, Journal of Applied Psychology, 90, 363-372.    |
| human and social resources index respect | 0.554      | Louis, Karen Seashore (1996), Teachers' Professional Community in Restructuring Schools, American Educational Research Journal, 33, 757-798.                                             |
| activism orientation                     | 0.524      | <a href="http://www.midss.org/">www.midss.org/</a>                                                                                                                                       |
| service quality beliefs (store-related)  | 0.478      | Bruner, G. C. (2012). Marketing Scales Handbook : A Compilation of Multi-Iter Measures for Consumer Behavior & Advertising Research, Volume 6. Fort Worth, Texas: GCBII Productions, LLC |

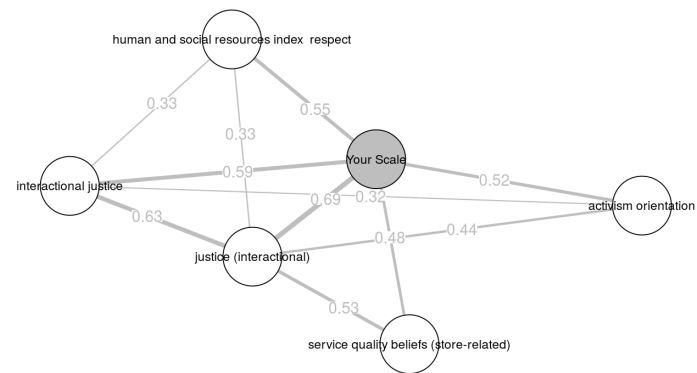

# Integrity

| Scales                                        | Similarity | Look up here                                                                                                                                                                                                                                     |
|-----------------------------------------------|------------|--------------------------------------------------------------------------------------------------------------------------------------------------------------------------------------------------------------------------------------------------|
| compassionate and self-image goals - roommate | 0.543      | <a href="http://www.midss.org/">www.midss.org/</a>                                                                                                                                                                                               |
| consumer motivation - convenience             | 0.525      | Barbopoulos, I. (2012). The Consumer Motivation Scale: Development of a multi-dimensional measure of economical, hedonic, and normative determinants of consumption (Doctoral dissertation, Department of Psychology, University of Gothenburg). |
| illness self concept directionality           | 0.501      | Morea, Jessica, Ronald Friend, and Robert Bennett (2008), Conceptualizing and Measuring Illness Self-Concept: A Comparison with Self-Esteem and Optimism in Predicting Fibromyalgia Adjustment, Research in Nursing and health, 31, 563-575.     |
| compassionate and self-image goals - friend   | 0.481      | <a href="http://www.midss.org/">www.midss.org/</a>                                                                                                                                                                                               |
| silver lining                                 | 0.46       | <a href="http://ppc.sas.upenn.edu/resources/questionnaires-researchers">ppc.sas.upenn.edu/resources/questionnaires-researchers</a>                                                                                                               |

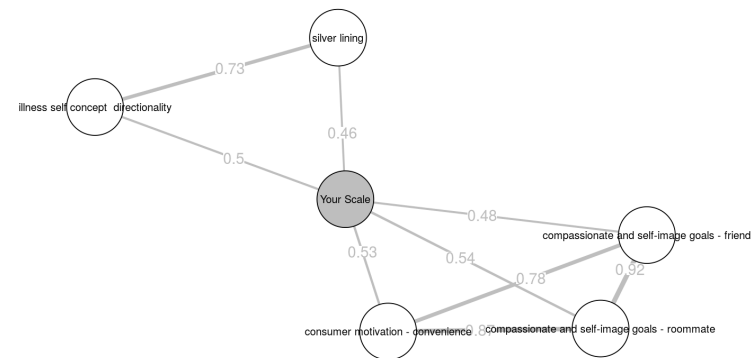

# Low competitiveness

Closest neighbors (click scale for indirect neighbors):

| Scales                                  | Similarity | Look up here                                                                                                                                                                             |
|-----------------------------------------|------------|------------------------------------------------------------------------------------------------------------------------------------------------------------------------------------------|
| dirty dozen n                           | 0.465      | <a href="https://openpsychometrics.org/_rawdata/">openpsychometrics.org/_rawdata/</a>                                                                                                    |
| dirty dozen p                           | 0.432      | <a href="https://openpsychometrics.org/_rawdata/">openpsychometrics.org/_rawdata/</a>                                                                                                    |
| empathizing                             | 0.431      | <a href="https://openpsychometrics.org/_rawdata/">openpsychometrics.org/_rawdata/</a>                                                                                                    |
| website controllability                 | 0.357      | Bruner, G. C. (2012). Marketing Scales Handbook : A Compilation of Multi-Item Measures For Consumer Behavior & Advertising Research, Volume 6. Fort Worth, Texas: GCBII Productions, LLC |
| binge eating adjective - self-criticism | 0.351      | <a href="http://www.scalesandmeasures.net/scales_view.php?id=1240">www.scalesandmeasures.net/scales_view.php?id=1240</a>                                                                 |

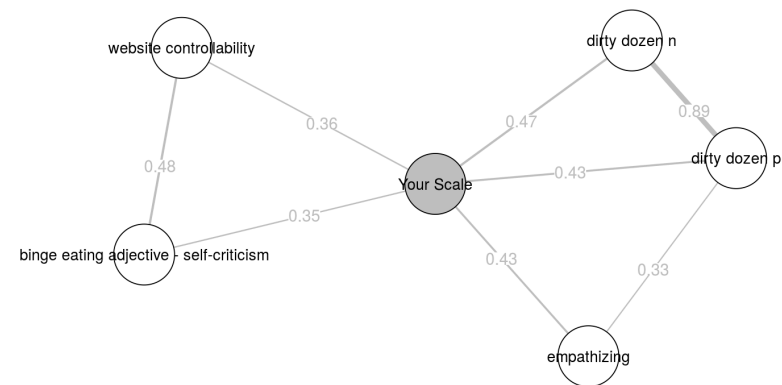

# Readiness to give feedback

| Scales                                              | Similarity | Look up here                                                                                                                                                                                                                             |
|-----------------------------------------------------|------------|------------------------------------------------------------------------------------------------------------------------------------------------------------------------------------------------------------------------------------------|
| professional labor support<br>tangible support      | 0.49       | Sauls, Donna J. (2006), Dimensions of Professional Labor Support for Intrapartum Practice, Journal of Nursing Scholarship, 38, 36-41.                                                                                                    |
| asthma education received from health care provider | 0.4        | Peterson-Sweeney, Kathleen, Ann McMullen, and H. Lorrie Yoos (2007), Impact of Asthma Education Received from Health Care Providers on Parental Illness Representation in Childhood Asthma, Research in Nursing and health, 30, 203-212. |
| microcomputer playfulness                           | 0.392      | Webster, Jane, and Joseph J. Martocchio (1992), Microcomputer Playfulness: Development of a Measure With Workplace Implications, MIS Quarterly, 16, 201-226.                                                                             |
| involvement in electrical service provision         | 0.383      | Bruner, G. C. (2012). Marketing Scales Handbook : A Compilation of Multi-Item Measures for Consumer Behavior & Advertising Research, Volume 6. Fort Worth, Texas: GCBII Productions, LLC                                                 |
| satisfaction with company                           | 0.349      | Bruner, G. C. (2012). Marketing Scales Handbook : A Compilation of Multi-Item Measures for Consumer Behavior & Advertising Research, Volume 6. Fort Worth, Texas: GCBII Productions, LLC                                                 |

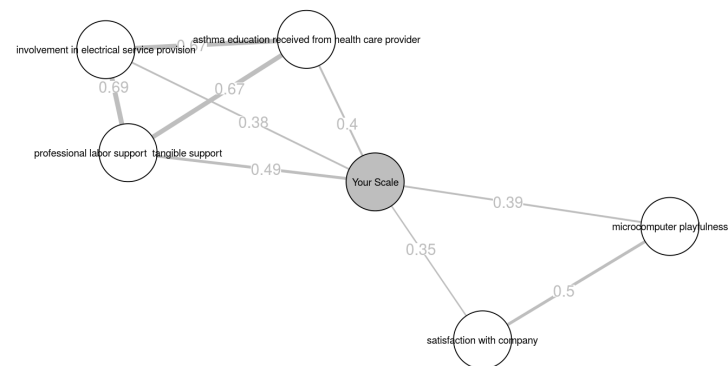

# Search for support

| Scales                                 | Similarity | Look up here                                                                                                                                                                                                                 |
|----------------------------------------|------------|------------------------------------------------------------------------------------------------------------------------------------------------------------------------------------------------------------------------------|
| negative expressivity                  | 0.741      | <a href="http://ipip.ori.org/newEmotionalIntelligenceKey.htm">ipip.ori.org/newEmotionalIntelligenceKey.htm</a>                                                                                                               |
| eesc - expression reluctance           | 0.644      | Penza-Clyve, S., & Zeman, J. (2002). Initial validation of the emotion express scale for children (EESC). <i>Journal of Clinical Child and Adolescent Psychology</i> , 31(4), 540-547.                                       |
| sensitive                              | 0.64       | <a href="http://ipip.ori.org/newHPIKeys.htm">ipip.ori.org/newHPIKeys.htm</a>                                                                                                                                                 |
| peer sexual victimization online       | 0.593      | Snchez, V., Muoz-Fernndez, N., & Vega-Gea, E. (2017). Peer sexual cybervictimization in adolescents: Development and validation of a scale. <i>International journal of clinical and health psychology</i> , 17(2), 171-179. |
| attitude toward the ad (intrusiveness) | 0.589      | Bruner, G. C. (2012). <i>Marketing Scales Handbook : A Compilation of Multi-Item Measures for Consumer Behavior &amp; Advertising Research, Volume 6</i> . Fort Worth, Texas: GCBII Productions, LLC                         |

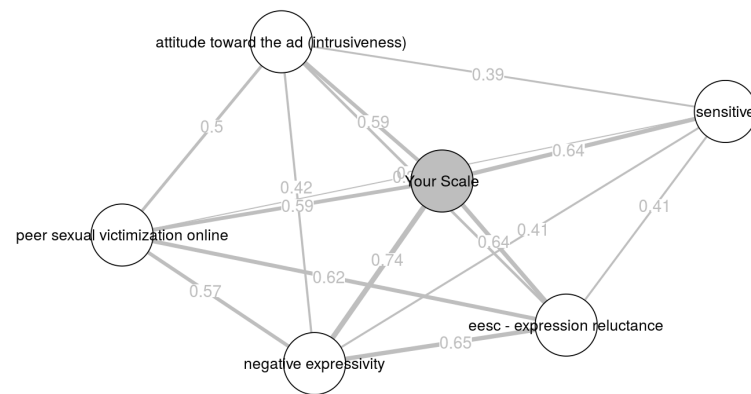

# Compliance – New: Trust

| Scales                   | Similarity | Look up here                                                                                                                                                                |
|--------------------------|------------|-----------------------------------------------------------------------------------------------------------------------------------------------------------------------------|
| trusting                 | 0.654      | <a href="http://ipop.ori.org/newHPIKeys.htm">ipop.ori.org/newHPIKeys.htm</a>                                                                                                |
| trust                    | 0.648      | <a href="http://ipop.ori.org/newNEOKey.htm">ipop.ori.org/newNEOKey.htm</a>                                                                                                  |
| agreeableness<br>20 item | 0.501      | <a href="http://ipop.ori.org/newNEOKey.htm">ipop.ori.org/newNEOKey.htm</a>                                                                                                  |
| mistrust                 | 0.492      | <a href="http://ipop.ori.org/newCAT-PD-SFV1.1Keys.htm">ipop.ori.org/newCAT-PD-SFV1.1Keys.htm</a>                                                                            |
| agreeableness3           | 0.449      | Major, Debra A. (2006), Linking Proactive Personality and the Big Five to Motivation to Learn and Development Activity, <i>Journal of Applied Psychology</i> , 91, 927-935. |

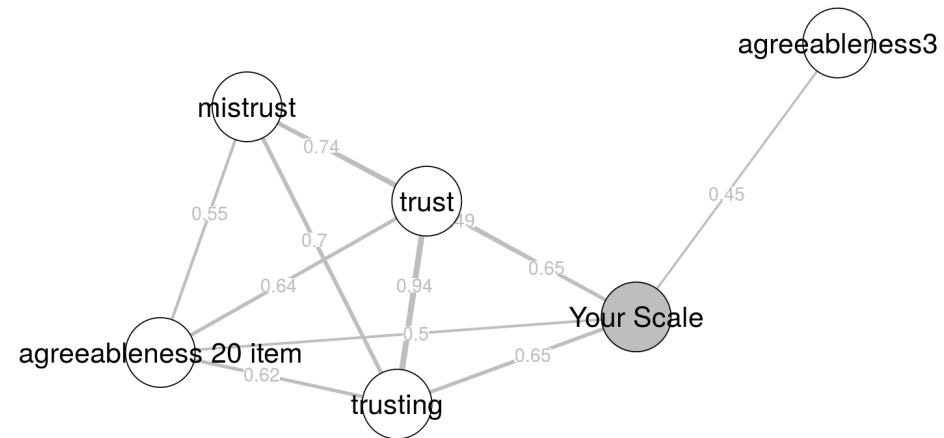

# Genuineness

| Scales                                               | Similarity | Look up here                                                                                                                                                                             |
|------------------------------------------------------|------------|------------------------------------------------------------------------------------------------------------------------------------------------------------------------------------------|
| perceived ease of use study2                         | 0.607      | Davis, Fred D. (1989), Perceived Usefulness, Perceived Ease of Use, and User Acceptance of Information Technology, MIS Quarterly, 13, 318-340.                                           |
| norm violation                                       | 0.503      | <a href="http://ipop.ori.org/newCAT-PD-SFv1.1Keys.htm">ipop.ori.org/newCAT-PD-SFv1.1Keys.htm</a>                                                                                         |
| vividness                                            | 0.48       | Bruner, G. C. (2012). Marketing Scales Handbook : A Compilation of Multi-Item Measures for Consumer Behavior & Advertising Research, Volume 6. Fort Worth, Texas: GCBII Productions, LLC |
| zung depression                                      | 0.448      | <a href="http://www.scalesandmeasures.net/scales_view.php?id=160">www.scalesandmeasures.net/scales_view.php?id=160</a>                                                                   |
| attitude toward the website (navigation convenience) | 0.427      | Bruner, G. C. (2012). Marketing Scales Handbook : A Compilation of Multi-Item Measures for Consumer Behavior & Advertising Research, Volume 6. Fort Worth, Texas: GCBII Productions, LLC |

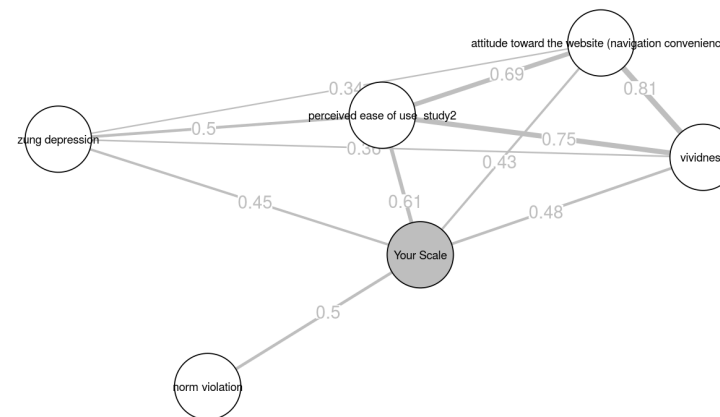



# Altruism

| Scales                                                | Similarity | Look up here                                                                                                                                                                                                                                                                                                              |
|-------------------------------------------------------|------------|---------------------------------------------------------------------------------------------------------------------------------------------------------------------------------------------------------------------------------------------------------------------------------------------------------------------------|
| forgiveness<br>mercy                                  | 0.501      | <a href="http://pip.ori.org/newVIAKey.htm">pip.ori.org/newVIAKey.htm</a>                                                                                                                                                                                                                                                  |
| vengefulness                                          | 0.441      | Yamagishi, T., Horita, Y., Mifune, N., Hashimoto, H., Li, Y., Shinada, M., ... & Simunovic, D. (2012). Rejection of unfair offers in the ultimatum game is no evidence of strong reciprocity. <i>Proceedings of the National Academy of Sciences</i> , 109(50), 20364-20368.                                              |
| fairness                                              | 0.413      | <a href="http://pip.ori.org/newHEXACO_PI_key.htm">pip.ori.org/newHEXACO_PI_key.htm</a>                                                                                                                                                                                                                                    |
| relational<br>maintenance -<br>conflict<br>management | 0.382      | Stafford, L., Dainton, M., & Haas, S. (2000). Measuring routine and strategic relational maintenance: Scale revision, sex versus gender roles, and the prediction of relational characteristics. <i>Communications Monographs</i> , 67(3), 306-323.                                                                       |
| social<br>understanding<br>child -<br>intention       | 0.374      | Tahiroglu, D., Moses, L. J., Carlson, S. M., Mahy, C. E., Olofson, E. L., & Sabbagh, M. A. (2014). The Children's Social Understanding Scale: Construction and validation of a parent-report measure for assessing individual differences in children's theories of mind. <i>Developmental psychology</i> , 50(11), 2485. |

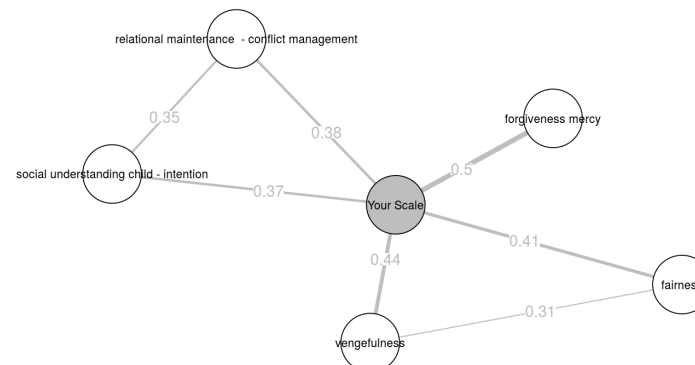

# Dominance

| Scales                         | Similarity | Look up here                                                                                       |
|--------------------------------|------------|----------------------------------------------------------------------------------------------------|
| big three perfectionism        | 0.715      | <a href="http://www.midss.org/">www.midss.org/</a>                                                 |
| achievement-striving3          | 0.678      | <a href="http://pip.ori.org/newTCIKey.htm">pip.ori.org/newTCIKey.htm</a>                           |
| perfectionism2                 | 0.564      | <a href="http://pip.ori.org/newCAT-PD-SFv1.1Keys.htm">pip.ori.org/newCAT-PD-SFv1.1Keys.htm</a>     |
| conscientiousness2             | 0.542      | <a href="http://pip.ori.org/newAB5CKey.htm">pip.ori.org/newAB5CKey.htm</a>                         |
| need for order and cleanliness | 0.467      | <a href="http://pip.ori.org/newSingleConstructsKey.htm">pip.ori.org/newSingleConstructsKey.htm</a> |

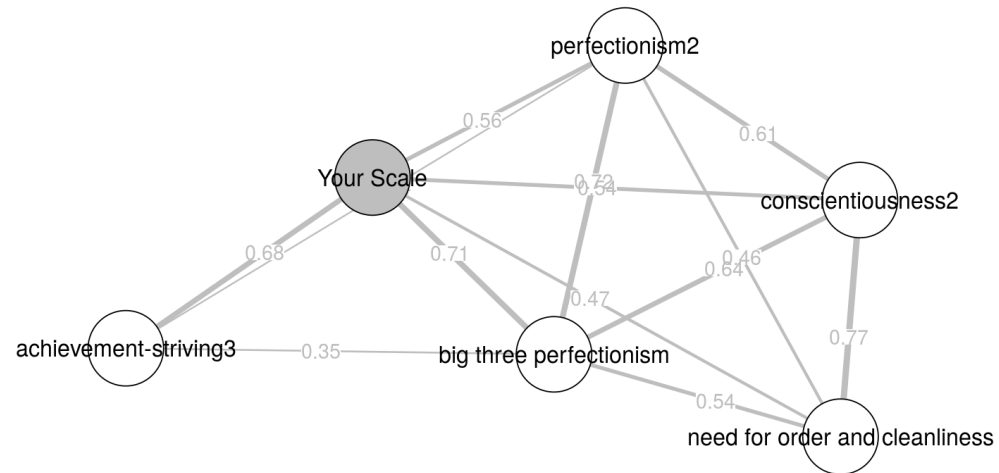

# Persistence

| Scales                      | Similarity | Look up here                                                                                     |
|-----------------------------|------------|--------------------------------------------------------------------------------------------------|
| forcefulness                | 0.715      | <a href="http://ipip.ori.org/newCPIKey.htm">ipip.ori.org/newCPIKey.htm</a>                       |
| emotional stability 20 item | 0.634      | <a href="http://ipip.ori.org/newBigFive5broadKey.htm">ipip.ori.org/newBigFive5broadKey.htm</a>   |
| toughness                   | 0.633      | <a href="http://ipip.ori.org/newAB5CKey.htm">ipip.ori.org/newAB5CKey.htm</a>                     |
| anger2                      | 0.627      | <a href="http://ipip.ori.org/newCAT-PD-SFv1.1Keys.htm">ipip.ori.org/newCAT-PD-SFv1.1Keys.htm</a> |
| anxiety2                    | 0.619      | <a href="http://ipip.ori.org/newJPI-RKey.htm">ipip.ori.org/newJPI-RKey.htm</a>                   |

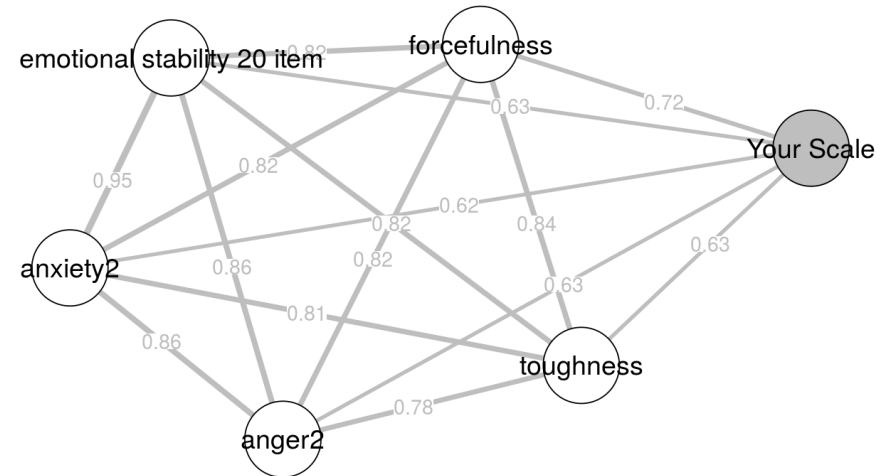

# Self-discipline

| Scales                      | Similarity | Look up here                                                                                     |
|-----------------------------|------------|--------------------------------------------------------------------------------------------------|
| anxiety2                    | 0.685      | <a href="http://ipop.ori.org/newJPI-RKey.htm">ipop.ori.org/newJPI-RKey.htm</a>                   |
| emotional instability       | 0.669      | <a href="http://ipop.ori.org/newMPQKey.htm">ipop.ori.org/newMPQKey.htm</a>                       |
| emotional stability 20 item | 0.651      | <a href="http://ipop.ori.org/newBigFive5broadKey.htm">ipop.ori.org/newBigFive5broadKey.htm</a>   |
| anger2                      | 0.647      | <a href="http://ipop.ori.org/newCAT-PD-SFv1.1Keys.htm">ipop.ori.org/newCAT-PD-SFv1.1Keys.htm</a> |
| anxiety                     | 0.642      | <a href="http://ipop.ori.org/newNEOKey.htm">ipop.ori.org/newNEOKey.htm</a>                       |

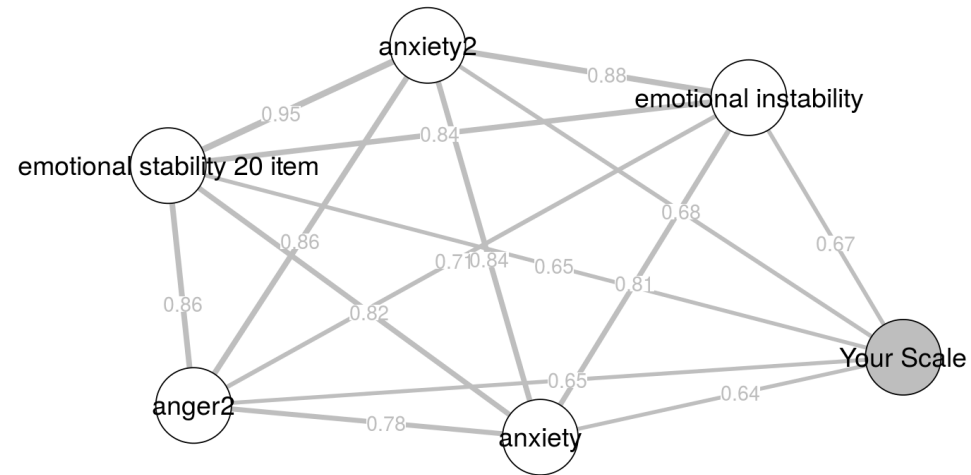

# Task planning – New: Planfulness

| Scales                    | Similarity | Look up here                                                                                                                |
|---------------------------|------------|-----------------------------------------------------------------------------------------------------------------------------|
| planfulness               | 0.613      | <a href="http://ipop.ori.org/newMPQKey.htm">ipop.ori.org/newMPQKey.htm</a>                                                  |
| enactment                 | 0.574      | Teel, Cynthia S. (2005), Developing and Testing a Self-Care Intervention for Older Adults in Caregiving Roles, 54, 193-201. |
| conscientiousness 20 item | 0.503      | <a href="http://ipop.ori.org/newNEOKey.htm">ipop.ori.org/newNEOKey.htm</a>                                                  |
| impulse control           | 0.466      | <a href="http://ipop.ori.org/newTCIKey.htm">ipop.ori.org/newTCIKey.htm</a>                                                  |
| irresponsibility          | 0.457      | <a href="http://ipop.ori.org/newCAT-PD-SFv1.1Keys.htm">ipop.ori.org/newCAT-PD-SFv1.1Keys.htm</a>                            |

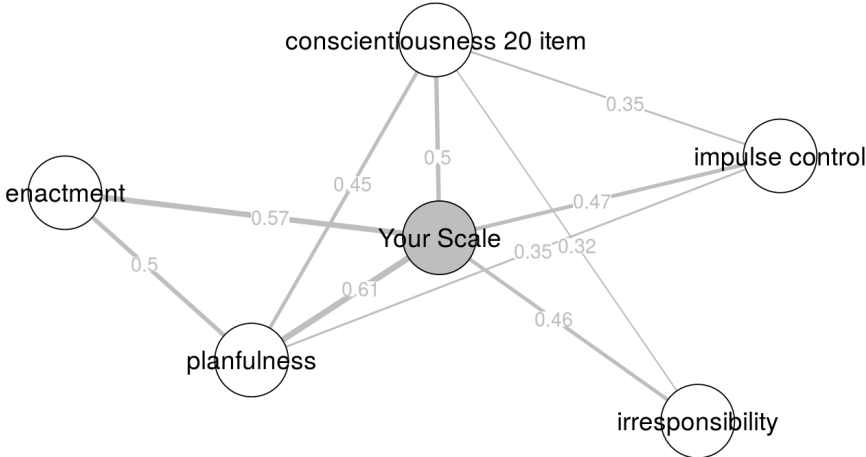

# Goal orientation

| Scales                                    | Similarity | Look up here                                                                                                                                                                                               |
|-------------------------------------------|------------|------------------------------------------------------------------------------------------------------------------------------------------------------------------------------------------------------------|
| fear of disclosure                        | 0.526      | Ragins, Belle Rose, John M. Cornwell, and Romila Singh (2007), Making the Invisible Visible: Fear and Disclosure of Sexual Orientation at Work, Journal of Applied Psychology, 92, 1103-1118.              |
| sexual orientation beliefs - discreetness | 0.52       | Arseneau, J. R., Grzanka, P. R., Miles, J. R., & Fassinger, R. E. (2013). Development and initial validation of the Sexual Orientation Beliefs Scale (SOBS). Journal of Counseling Psychology, 60(3), 407. |
| sexual orientation beliefs - entitativity | 0.509      | Arseneau, J. R., Grzanka, P. R., Miles, J. R., & Fassinger, R. E. (2013). Development and initial validation of the Sexual Orientation Beliefs Scale (SOBS). Journal of Counseling Psychology, 60(3), 407. |
| organization image                        | 0.493      | Cable, Daniel M. (2006), Managing Job Seekers' Organizational Image Beliefs: The Role of Media Richness and Media Credibility, Journal of Applied Psychology, 91, 828-840.                                 |
| industriousness                           | 0.472      | <a href="http://ipp.ori.org/newTCIKey.htm">ipp.ori.org/newTCIKey.htm</a>                                                                                                                                   |

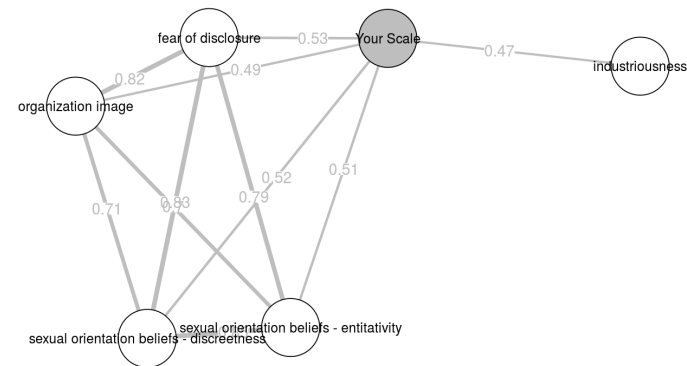

# Carefulness

| Scales                                           | Similarity | Look up here                                                                                                                                                                                                       |
|--------------------------------------------------|------------|--------------------------------------------------------------------------------------------------------------------------------------------------------------------------------------------------------------------|
| attitude toward the ad (creativity well-crafted) | 0.512      | Bruner, G. C. (2012). Marketing Scales Handbook : A Compilation of Multi-Item Measures for Consumer Behavior & Advertising Research, Volume 6. Fort Worth, Texas: GCBII Productions, LLC                           |
| self-enhancement (public)                        | 0.466      | Bruner, G. C. (2012). Marketing Scales Handbook : A Compilation of Multi-Item Measures for Consumer Behavior & Advertising Research, Volume 6. Fort Worth, Texas: GCBII Productions, LLC                           |
| positive appraisal of care consequential gain    | 0.453      | Yamamoto-Mitani, Noriko, Kazuko Ishigaki, and Noriko Kawahara-Maekawa (2003), Factors of Positive Appraisal of Care Among Japanese Family Caregivers of Older Adults, Research in Nursing and health, 26, 337-350. |
| burden childcare                                 | 0.442      | <a href="http://www.dataarchive.lisssdata.nl/concepts">www.dataarchive.lisssdata.nl/concepts</a>                                                                                                                   |
| service convenience (post-purchase)              | 0.399      | Bruner, G. C. (2012). Marketing Scales Handbook : A Compilation of Multi-Item Measures for Consumer Behavior & Advertising Research, Volume 6. Fort Worth, Texas: GCBII Productions, LLC                           |

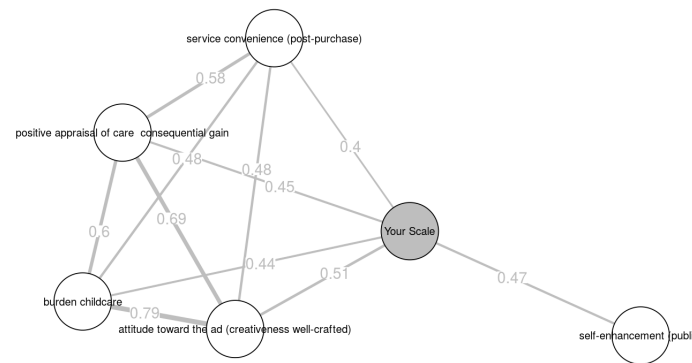

# Orderliness

| Scales                          | Similarity | Look up here                                                                                                                                                                                                             |
|---------------------------------|------------|--------------------------------------------------------------------------------------------------------------------------------------------------------------------------------------------------------------------------|
| orderliness2                    | 0.8        | <a href="http://pip.ori.org/new6FPQKey.htm">pip.ori.org/new6FPQKey.htm</a>                                                                                                                                               |
| six factors - conscientiousness | 0.679      | (D.L.) Milojev, P., Osborne, D., Greaves, L. M., Barlow, F. K., & Sibley, C. G. (2013). The MiniPIP6: Tiny yet highly stable markers of Big Six personality. <i>Journal of Research in Personality, 47</i> (6), 936-944. |
| conscientiousness 20 item2      | 0.606      | <a href="http://pip.ori.org/newBigFive5broadKey.htm">pip.ori.org/newBigFive5broadKey.htm</a>                                                                                                                             |
| orderliness                     | 0.562      | <a href="http://pip.ori.org/newNEOKey.htm">pip.ori.org/newNEOKey.htm</a>                                                                                                                                                 |
| organization2                   | 0.544      | <a href="http://pip.ori.org/newHEXACO_PI_key.htm">pip.ori.org/newHEXACO_PI_key.htm</a>                                                                                                                                   |

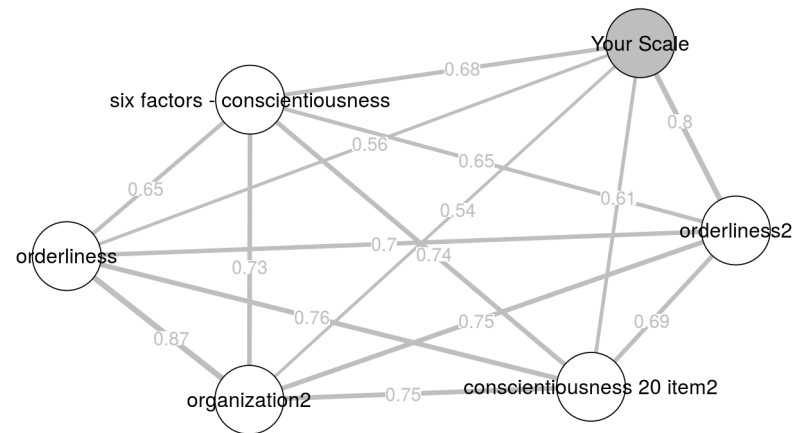



# Wish to work

| Scales                                                       | Similarity | Look up here                                                                                                                                                                                                               |
|--------------------------------------------------------------|------------|----------------------------------------------------------------------------------------------------------------------------------------------------------------------------------------------------------------------------|
| carroll depression -<br>generalsomatic                       | 0.45       | <a href="http://www.scalesandmeasures.net/scales_view.php?id=132">www.scalesandmeasures.net/scales_view.php?id=132</a>                                                                                                     |
| unlikely virtues                                             | 0.42       | <a href="http://ipip.ori.org/newMPQKey.htm">ipip.ori.org/newMPQKey.htm</a>                                                                                                                                                 |
| use of emotion                                               | 0.419      | Wong, C. S., & Law, K. S. (2002). The effects of leader and follower emotional intelligence on performance and attitude: An exploratory study. <i>The leadership quarterly</i> , 13(3), 243-274.                           |
| fashion store<br>personality - chaos                         | 0.418      | Willems, K, Swinnen, G, Janssens, W, & Brengman, M (0) Fashion store personality: Scale development and relation to self-congruity theory <i>Journal of Global Fashion Marketing</i> ,(), -                                |
| breastfeeding self<br>efficacy<br>breastfeeding<br>technique | 0.393      | Creedy, Debra K., Cindy-Lee Dennis, and Rosemary Blyth (2003), Psychometric Characteristics of the Breastfeeding Self-Efficacy Scale: Data from an Australian Sample, <i>Research in Nursing and health</i> , 26, 143-152. |

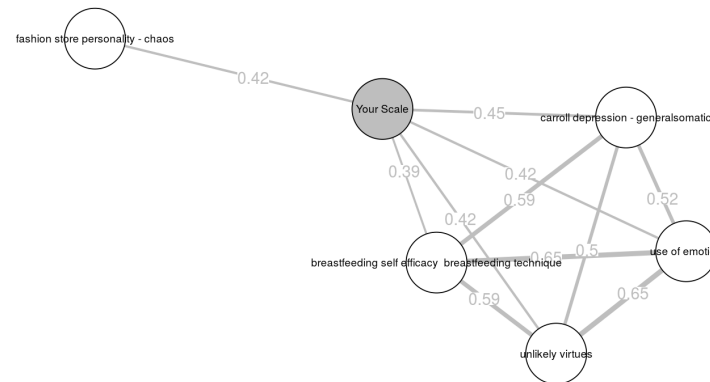

# Productivity – New: Initiative

| Scales                               | Similarity | Look up here                                                                                                                                                                                                         |
|--------------------------------------|------------|----------------------------------------------------------------------------------------------------------------------------------------------------------------------------------------------------------------------|
| initiative                           | 0.77       | <a href="http://pip.ori.org/newTCIKey.htm">pip.ori.org/newTCIKey.htm</a>                                                                                                                                             |
| self-discipline                      | 0.621      | <a href="http://pip.ori.org/newNEOKey.htm">pip.ori.org/newNEOKey.htm</a>                                                                                                                                             |
| non-perseverance                     | 0.595      | <a href="http://pip.ori.org/newCAT-PD-SFv1.1Keys.htm">pip.ori.org/newCAT-PD-SFv1.1Keys.htm</a>                                                                                                                       |
| motivational characteristics of work | 0.59       | Morgeson, Frederick P. (2006), The Work Design Questionnaire (WDQ): Developing and Validating a Comprehensive Measure for Assessing Job Design and the Nature of Work, Journal of Applied Psychology, 91, 1321-1339. |
| competitive                          | 0.583      | <a href="http://pip.ori.org/newHPIKeys.htm">pip.ori.org/newHPIKeys.htm</a>                                                                                                                                           |

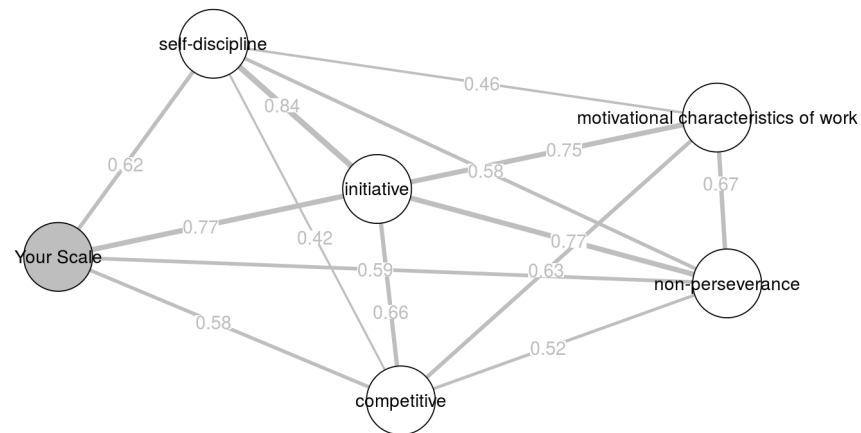

# Sociability

| Scales            | Similarity | Look up here                                                                 |
|-------------------|------------|------------------------------------------------------------------------------|
| sociability3      | 0.689      | <a href="http://ipip.ori.org/newCPIKey.htm">ipip.ori.org/newCPIKey.htm</a>   |
| social discomfort | 0.685      | <a href="http://ipip.ori.org/newTCIKey.htm">ipip.ori.org/newTCIKey.htm</a>   |
| friendliness5     | 0.607      | <a href="http://ipip.ori.org/new16PFKey.htm">ipip.ori.org/new16PFKey.htm</a> |
| likes people      | 0.526      | <a href="http://ipip.ori.org/newHPIKeys.htm">ipip.ori.org/newHPIKeys.htm</a> |
| friendliness      | 0.524      | <a href="http://ipip.ori.org/newNEOKey.htm">ipip.ori.org/newNEOKey.htm</a>   |

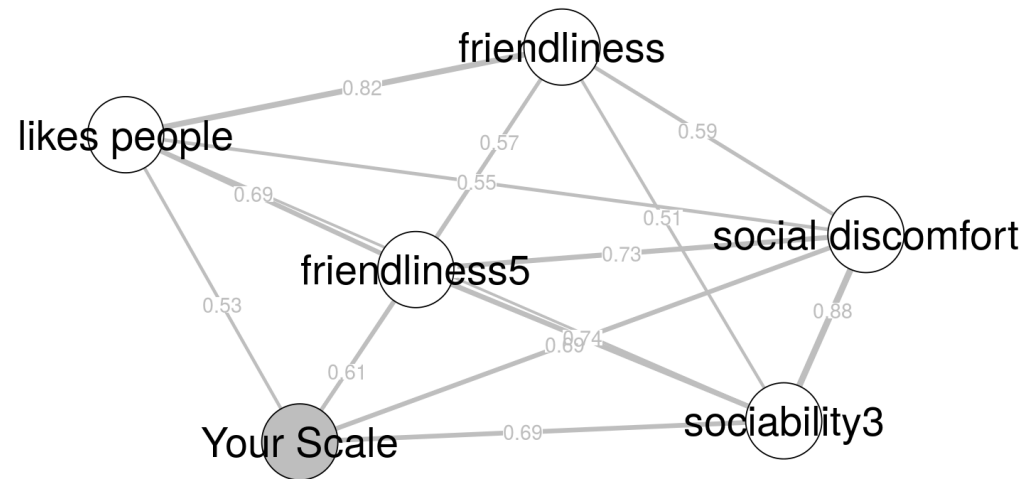

# Readiness to take risks

| Scales                  | Similarity | Look up here                                                                                                                                                                                         |
|-------------------------|------------|------------------------------------------------------------------------------------------------------------------------------------------------------------------------------------------------------|
| fun-seeking             | 0.595      | <a href="http://ipop.ori.org/newBIS_BASkey.htm">ipop.ori.org/newBIS_BASkey.htm</a>                                                                                                                   |
| risk-avoidance          | 0.51       | <a href="http://ipop.ori.org/newMPQKey.htm">ipop.ori.org/newMPQKey.htm</a>                                                                                                                           |
| harm avoidance2         | 0.502      | Patrick, C. J., Curtin, J. J., & Tellegen, A. (2002). Development and validation of a brief form of the Multidimensional Personality Questionnaire. <i>Psychological assessment</i> , 14(2), 150.    |
| excitement-seeking      | 0.481      | <a href="http://ipop.ori.org/newNEOKey.htm">ipop.ori.org/newNEOKey.htm</a>                                                                                                                           |
| disconfirmation (movie) | 0.478      | Bruner, G. C. (2012). <i>Marketing Scales Handbook : A Compilation of Multi-Item Measures for Consumer Behavior &amp; Advertising Research, Volume 6</i> . Fort Worth, Texas: GCBII Productions, LLC |

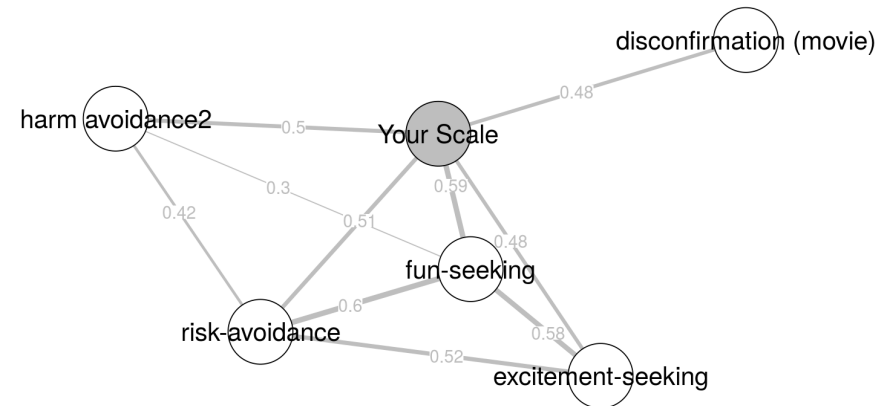

# Wish for affiliation

| Scales                          | Similarity | Look up here                                                                                                                                                                                                                                                                         |
|---------------------------------|------------|--------------------------------------------------------------------------------------------------------------------------------------------------------------------------------------------------------------------------------------------------------------------------------------|
| introspection                   | 0.708      | <a href="http://pip.ori.org/newAB5CKey.htm">pip.ori.org/newAB5CKey.htm</a>                                                                                                                                                                                                           |
| introversion                    | 0.697      | <a href="http://pip.ori.org/new16PFKey.htm">pip.ori.org/new16PFKey.htm</a>                                                                                                                                                                                                           |
| aggression                      | 0.534      | Patrick, C. J., Curtin, J. J., & Tellegen, A. (2002). Development and validation of a brief form of the Multidimensional Personality Questionnaire. <i>Psychological assessment</i> , 14(2), 150.                                                                                    |
| ad trust - affect               | 0.496      | Bruner, G. C. (2012). <i>Marketing Scales Handbook : A Compilation of Multi-Item Measures for Consumer Behavior &amp; Advertising Research, Volume 6</i> . Fort Worth, Texas: GCBII Productions, LLC                                                                                 |
| hospital anxiety and depression | 0.479      | Goodchild, C. E., Platts, R. G., Treharne, G. J., & Booth, D. A. (2005). Excessive negative affect and deficient positive affect in anxiety and depression: balancing the valences in the Hospital Anxiety and Depression Scale (HADS). <i>Health Psychology Update</i> , 14(2), 45. |

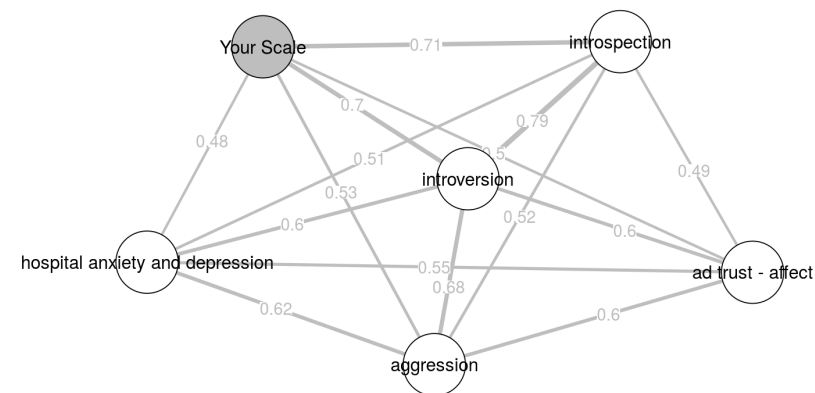

# Positive Attitude – New: Cheerfulness

| Scales                                    | Similarity | Look up here                                                                                                                                                                             |
|-------------------------------------------|------------|------------------------------------------------------------------------------------------------------------------------------------------------------------------------------------------|
| psychiatric evaluation profile - optimism | 0.638      | <a href="http://www.scalesandmeasures.net/scales_view.php?id=71">www.scalesandmeasures.net/scales_view.php?id=71</a>                                                                     |
| store design (exterior)                   | 0.54       | Bruner, G. C. (2012). Marketing Scales Handbook : A Compilation of Multi-Item Measures for Consumer Behavior & Advertising Research, Volume 6. Fort Worth, Texas: GCBII Productions, LLC |
| body surveillance                         | 0.515      | McKinley, N. M., & Hyde, J. S. (1996). The objectified body consciousness scale: Development and validation. <i>Psychology of women quarterly</i> , 20(2), 181-215.                      |
| cheerfulness                              | 0.512      | <a href="http://pip.ori.org/newNEOKey.htm">pip.ori.org/newNEOKey.htm</a>                                                                                                                 |
| beck depression - body                    | 0.495      | <a href="http://www.scalesandmeasures.net/scales_view.php?id=731">www.scalesandmeasures.net/scales_view.php?id=731</a>                                                                   |

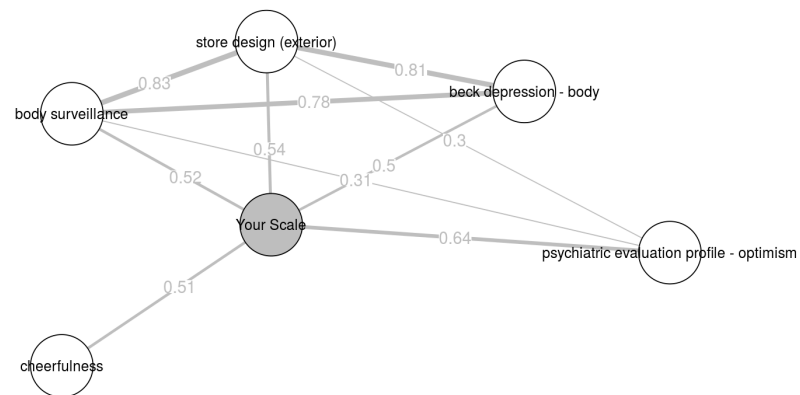

# Forcefulness – New: Assertiveness

| Scales                                  | Similarity | Look up here                                                                                                                                                                             |
|-----------------------------------------|------------|------------------------------------------------------------------------------------------------------------------------------------------------------------------------------------------|
| evaluate view of father of grandchild   | 0.691      | Rempusheski, Veronica F., and Catherine T. O'Hara (2005), Psychometric Properties of the Grandparent Perceptions of Family Scale (GPFS), Nursing Research, 54, 419-427.                  |
| self-disclosure attitudes/opinions      | 0.636      | (D.L.) Jourard, S. M., & Lasakow, P. (1958). Some factors in self-disclosure. The Journal of Abnormal and Social Psychology, 56(1), 91.                                                  |
| evaluative view of mother of grandchild | 0.575      | Rempusheski, Veronica F., and Catherine T. O'Hara (2005), Psychometric Properties of the Grandparent Perceptions of Family Scale (GPFS), Nursing Research, 54, 419-427.                  |
| attitude toward the ad (receptiveness)  | 0.487      | Bruner, G. C. (2012). Marketing Scales Handbook : A Compilation of Multi-Item Measures for Consumer Behavior & Advertising Research, Volume 6. Fort Worth, Texas: GCBII Productions, LLC |
| trusting relationship                   | 0.478      | <a href="http://www.scalesandmeasures.net/scales_view.php?id=1187">www.scalesandmeasures.net/scales_view.php?id=1187</a>                                                                 |

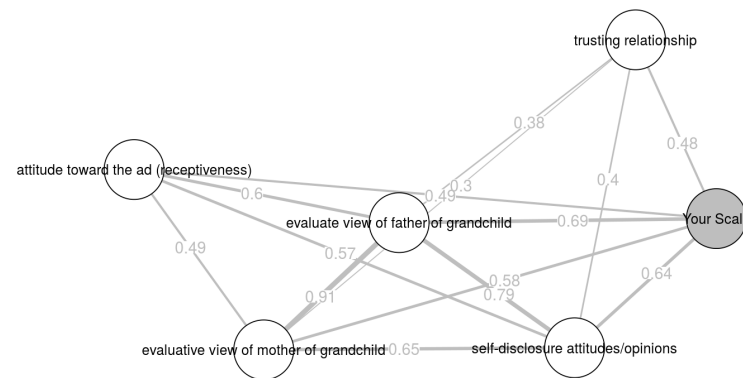

# Communicativeness

| Scales                            | Similarity | Look up here                                                                                                                                                                                                                                        |
|-----------------------------------|------------|-----------------------------------------------------------------------------------------------------------------------------------------------------------------------------------------------------------------------------------------------------|
| reserve                           | 0.455      | <a href="http://ipip.ori.org/new16PFKey.htm">ipip.ori.org/new16PFKey.htm</a>                                                                                                                                                                        |
| bcbpi - odd                       | 0.449      | <a href="http://www.scalesandmeasures.net/scales_view.php?id=1241">www.scalesandmeasures.net/scales_view.php?id=1241</a>                                                                                                                            |
| nonverbal immediacy - observer    | 0.418      | <a href="http://www.midss.org/">www.midss.org/</a>                                                                                                                                                                                                  |
| relational maintenance - openness | 0.41       | Stafford, L., Dainton, M., & Haas, S. (2000). Measuring routine and strategic relational maintenance: Scale revision, sex versus gender roles, and the prediction of relational characteristics. <i>Communications Monographs</i> , 67(3), 306-323. |
| nonverbal immediacy - self        | 0.405      | <a href="http://www.midss.org/">www.midss.org/</a>                                                                                                                                                                                                  |

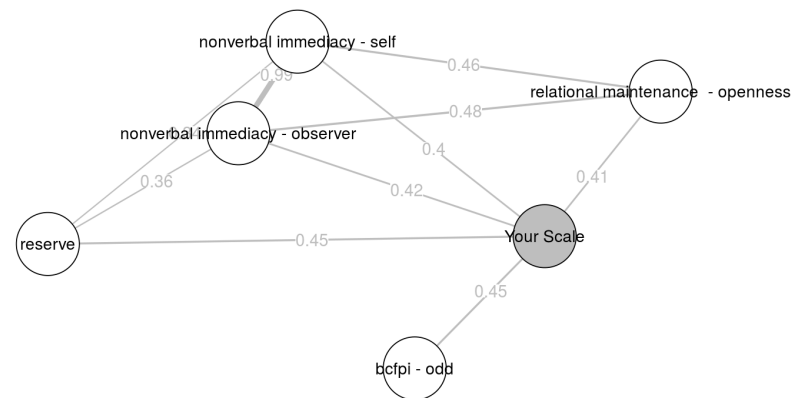



# Humor

| Scales            | Similarity | Look up here                                                                         |
|-------------------|------------|--------------------------------------------------------------------------------------|
| humor playfulness | 0.633      | <a href="http://ipip.ori.org/newVIAKey.htm">ipip.ori.org/newVIAKey.htm</a>           |
| richmond humor    | 0.599      | <a href="http://www.midss.org/">www.midss.org/</a>                                   |
| humor styles      | 0.54       | <a href="http://openpsychometrics.org/_rawdata/">openpsychometrics.org/_rawdata/</a> |
| entertaining      | 0.441      | <a href="http://ipip.ori.org/newHPIKeys.htm">ipip.ori.org/newHPIKeys.htm</a>         |
| adventurousness3  | 0.391      | <a href="http://ipip.ori.org/newCPIKey.htm">ipip.ori.org/newCPIKey.htm</a>           |

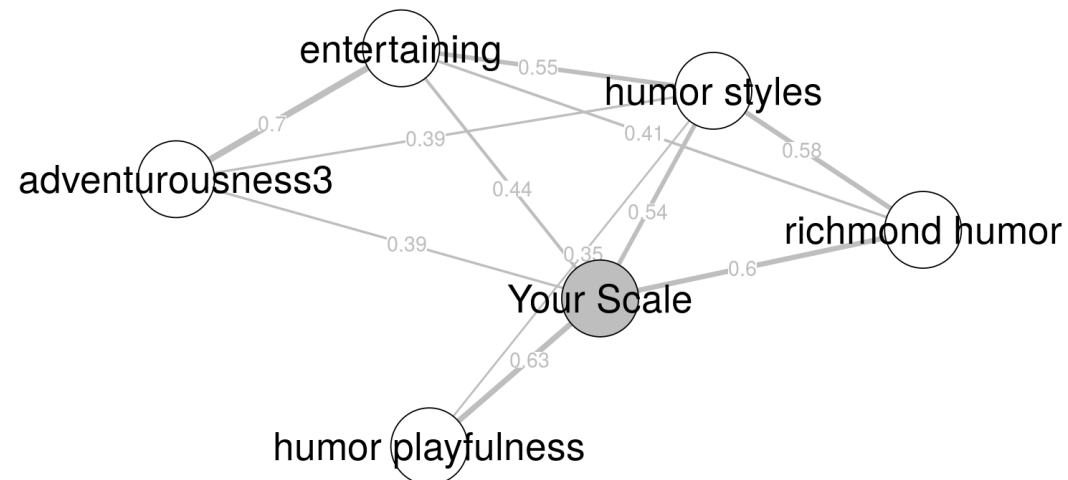

# Conviviality – New: Gregariousness

| Scales                   | Similarity | Look up here                                                                                                                                                                              |
|--------------------------|------------|-------------------------------------------------------------------------------------------------------------------------------------------------------------------------------------------|
| sociability2             | 0.719      | <a href="http://ipop.ori.org/newHEXACO_PI_key.htm">ipop.ori.org/newHEXACO_PI_key.htm</a>                                                                                                  |
| introversion             | 0.645      | <a href="http://ipop.ori.org/new16PFKey.htm">ipop.ori.org/new16PFKey.htm</a>                                                                                                              |
| enjoyment (expected)     | 0.596      | Bruner, G. C. (2012). Marketing Scales Handbook : A Compilation of Multi-Item Measures For Consumer Behavior & Advertising Research, Volume 6. Fort Worth, Texas: GCBII Productions, LLC  |
| aggression               | 0.571      | Patrick, C. J., Curtin, J. J., & Tellegen, A. (2002). Development and validation of a brief form of the Multidimensional Personality Questionnaire. Psychological assessment, 14(2), 150. |
| dangerous thrill-seeking | 0.53       | <a href="http://ipop.ori.org/newSingleConstructsKey.htm">ipop.ori.org/newSingleConstructsKey.htm</a>                                                                                      |

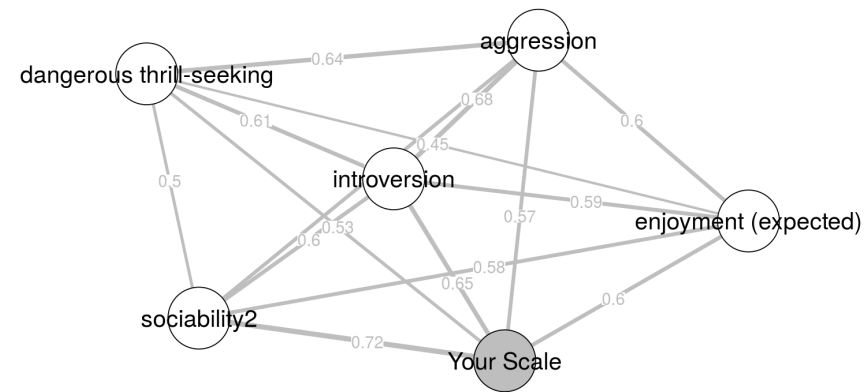

# Energy

| Scales                                       | Similarity | Look up here                                                                                                                                                                                                                                                                                                      |
|----------------------------------------------|------------|-------------------------------------------------------------------------------------------------------------------------------------------------------------------------------------------------------------------------------------------------------------------------------------------------------------------|
| importance of status based career satisfiers | 0.507      | Eddleston, Kimberly (2006), Explaining Sex Differences in Managerial Career Satisfier Preferences: The Role of Gender Self-Schema, Journal of Applied Psychology, 91, 437-445.                                                                                                                                    |
| in role performance sales volume             | 0.437      | Bagozzi, Richard P., Jacinto C. Gavino Jr., and Willem Verbeke (2003), Culture Moderates the Self-Regulation of Shame and Its Effects on Performance: The Case of Salespersons in the Netherlands and the Philippines, Journal of Applied Psychology, 88, 219-233.                                                |
| consumer motivation - quality                | 0.408      | Barbopoulos, I. (2012).The Consumer Motivation Scale: Development of a multi-dimensional measure of economical, hedonic, and normative determinants of consumption(Doctoral dissertation, Department of Psychology, University of Gothenburg).                                                                    |
| ribs - appreciation/performance              | 0.396      | David, O. A. (2013). The online Prescriptive Index platform for the assessment of managerial competencies and coaching needs: Development and initial validation of the experience sampling Mood Wheel and the Manager-Rational and Irrational Beliefs Scale.Romanian Journal of Applied Psychology,15(2), 41-50. |
| collective personality emotional stability   | 0.393      | Hofmann, David (2005), Leadership, Collective Personality, and Performance, Journal of Applied Psychology, 90, 509-522.                                                                                                                                                                                           |

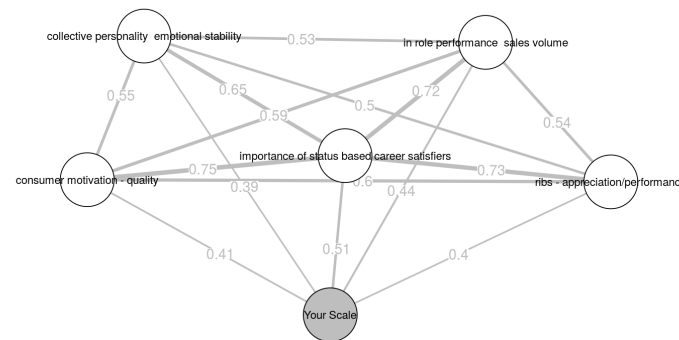

# Equanimity – New: Patience

| Scales                    | Similarity | Look up here                                                                                                                                                                                       |
|---------------------------|------------|----------------------------------------------------------------------------------------------------------------------------------------------------------------------------------------------------|
| negative reactivity       | 0.66       | Graham McClowry, Sandra, Charles Halverson, and Ann Sanson (2003), A Re-Examination of the Validity and Reliability of the School-Age Temperament Inventory, Nursing Research, 52, 176-182.        |
| affective empathy - anger | 0.619      | Olderbak, S., Sassenrath, C., Keller, J., & Wilhelm, O. (2014). An emotion-differentiated perspective on empathy with the emotion specific empathy questionnaire. Frontiers in psychology, 5, 653. |
| patience                  | 0.548      | <a href="http://ipop.ori.org/newHEXACO_PI_key.htm">ipop.ori.org/newHEXACO_PI_key.htm</a>                                                                                                           |
| anger                     | 0.494      | <a href="http://ipop.ori.org/newNEOKey.htm">ipop.ori.org/newNEOKey.htm</a>                                                                                                                         |
| display negative          | 0.489      | Simpson, Patricia (2004), Gender Differences: Emotional Expression and Feelings of Personal Inauthenticity, Journal of Applied Psychology, 89, 715-721.                                            |

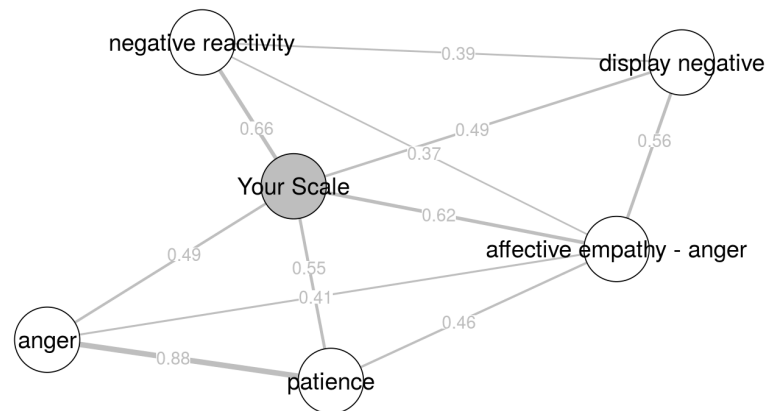

# Confidence

| Scales                                                | Similarity | Look up here                                                                                                                                                                                                                                                            |
|-------------------------------------------------------|------------|-------------------------------------------------------------------------------------------------------------------------------------------------------------------------------------------------------------------------------------------------------------------------|
| chicago multiscale depression - mood                  | 0.585      | <a href="http://www.scalesandmeasures.net/scales_view.php?id=310">www.scalesandmeasures.net/scales_view.php?id=310</a>                                                                                                                                                  |
| beck depression - mood                                | 0.578      | <a href="http://www.scalesandmeasures.net/scales_view.php?id=731">www.scalesandmeasures.net/scales_view.php?id=731</a>                                                                                                                                                  |
| children's perception of others' depression           | 0.533      | <a href="http://www.midss.org/">www.midss.org/</a>                                                                                                                                                                                                                      |
| depressed mood - sleep                                | 0.528      | Roane, B. M., Seifer, R., Sharkey, K. M., Van Reen, E., Bond, T. L., Raffray, T., & Carskadon, M. A. (2013). Reliability of a scale assessing depressed mood in the context of sleep. <i>TPM. Testing, Psychometrics, Methodology in Applied Psychology</i> , 20(1), 3. |
| rush behavioral outcomes depression symptoms distress | 0.524      | Perraud, Suzanne, Louis Fogg, and Edwin Kopytko (2006), Predictive Validity of the Depression Coping Self-Efficacy Scale (DCSES), <i>Research in Nursing and health</i> , 29, 147-160.                                                                                  |

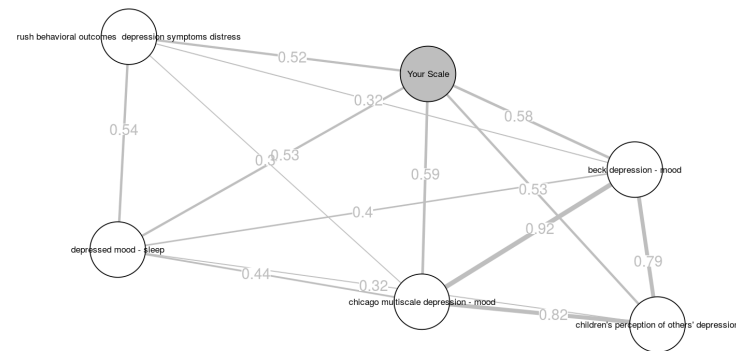

# Carefreeness

| Scales                                      | Similarity | Look up here                                                                                                                                                                             |
|---------------------------------------------|------------|------------------------------------------------------------------------------------------------------------------------------------------------------------------------------------------|
| athletic skills coping - freedom from worry | 0.592      | <a href="http://www.scalesandmeasures.net/scales_view.php?id=4286">www.scalesandmeasures.net/scales_view.php?id=4286</a>                                                                 |
| penn state worry                            | 0.543      | <a href="http://www.midss.org/">www.midss.org/</a>                                                                                                                                       |
| student worry                               | 0.523      | <a href="http://www.scalesandmeasures.net/scales_view.php?id=668">www.scalesandmeasures.net/scales_view.php?id=668</a>                                                                   |
| liveliness                                  | 0.495      | <a href="http://ipip.ori.org/newHEXACO_PI_key.htm">ipip.ori.org/newHEXACO_PI_key.htm</a>                                                                                                 |
| worry                                       | 0.472      | Bruner, G. C. (2012). Marketing Scales Handbook : A Compilation of Multi-Item Measures For Consumer Behavior & Advertising Research, Volume 6. Fort Worth, Texas: GCBII Productions, LLC |

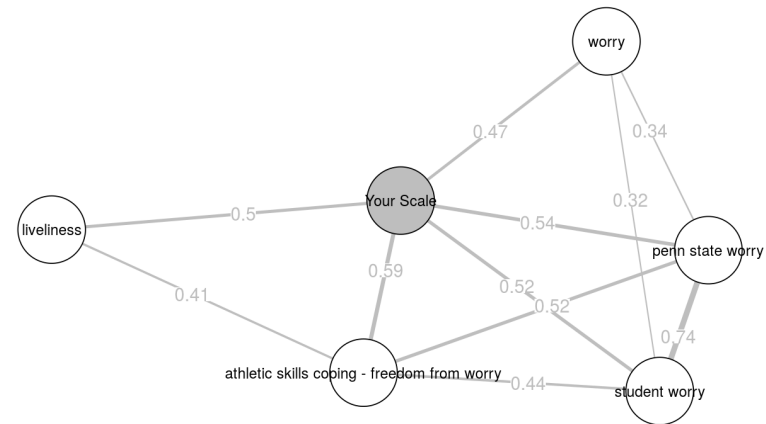

# Mental Balance – New: Toughness

| Scales                                       | Similarity | Look up here                                                                                                                                                |
|----------------------------------------------|------------|-------------------------------------------------------------------------------------------------------------------------------------------------------------|
| calmness3                                    | 0.51       | <a href="http://ipop.ori.org/newHPIKeys.htm">ipop.ori.org/newHPIKeys.htm</a>                                                                                |
| toughness                                    | 0.503      | <a href="http://ipop.ori.org/newAB5CKey.htm">ipop.ori.org/newAB5CKey.htm</a>                                                                                |
| anxiety                                      | 0.493      | <a href="http://ipop.ori.org/newNEOKey.htm">ipop.ori.org/newNEOKey.htm</a>                                                                                  |
| no social anxiety                            | 0.489      | <a href="http://ipop.ori.org/newHPIKeys.htm">ipop.ori.org/newHPIKeys.htm</a>                                                                                |
| self efficacy relocation engagement efficacy | 0.477      | Rossen, Eileen K., and Kenneth J. Gruber (2007), Development and Psychometric Testing of the Relocation Self-Efficacy Scale, Nursing Research, 56, 244-251. |

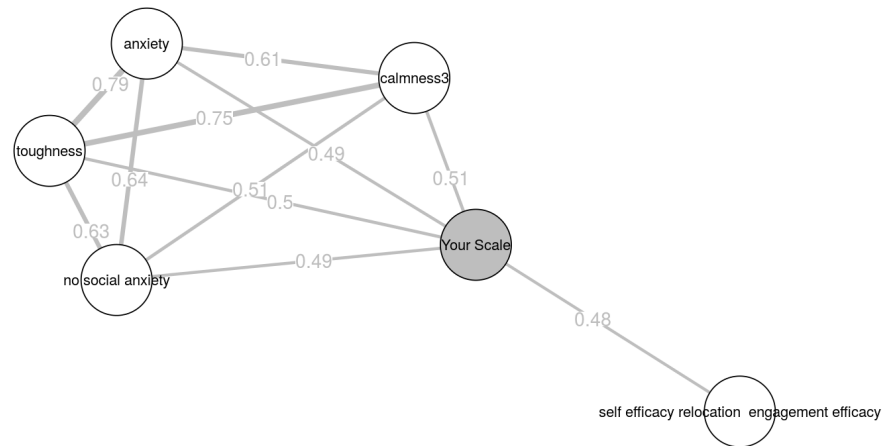

# Drive

| Scales       | Similarity | Look up here                                                                           |
|--------------|------------|----------------------------------------------------------------------------------------|
| extravagance | 0.478      | <a href="http://pip.ori.org/newTCIKey.htm">pip.ori.org/newTCIKey.htm</a>               |
| immoderation | 0.476      | <a href="http://pip.ori.org/newNEOKey.htm">pip.ori.org/newNEOKey.htm</a>               |
| being alone  | 0.471      | <a href="http://pip.ori.org/newORAISKey.htm">pip.ori.org/newORAISKey.htm</a>           |
| flexibility  | 0.421      | <a href="http://pip.ori.org/newHEXACO_PI_key.htm">pip.ori.org/newHEXACO_PI_key.htm</a> |
| optimism2    | 0.419      | <a href="http://pip.ori.org/newTCIKey.htm">pip.ori.org/newTCIKey.htm</a>               |

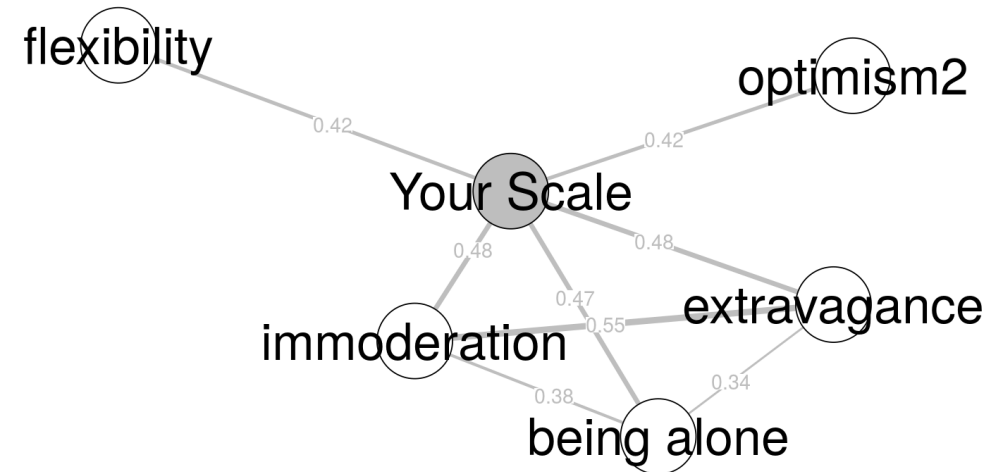



# Emotional robustness

| Scales                      | Similarity | Look up here                                                                                                                                                                                               |
|-----------------------------|------------|------------------------------------------------------------------------------------------------------------------------------------------------------------------------------------------------------------|
| imperturbability            | 0.624      | <a href="http://ipip.ori.org/newAB5CKey.htm">ipip.ori.org/newAB5CKey.htm</a>                                                                                                                               |
| toughness                   | 0.621      | <a href="http://ipip.ori.org/newAB5CKey.htm">ipip.ori.org/newAB5CKey.htm</a>                                                                                                                               |
| sentimentality2             | 0.591      | <a href="http://ipip.ori.org/newHEXACO_PI_key.htm">ipip.ori.org/newHEXACO_PI_key.htm</a>                                                                                                                   |
| sentimentality3             | 0.565      | <a href="http://ipip.ori.org/newTCIKey.htm">ipip.ori.org/newTCIKey.htm</a>                                                                                                                                 |
| affective empathy - sadness | 0.564      | Olderbak, S., Sassenrath, C., Keller, J., & Wilhelm, O. (2014). An emotion-differentiated perspective on empathy with the emotion specific empathy questionnaire. <i>Frontiers in psychology</i> , 5, 653. |

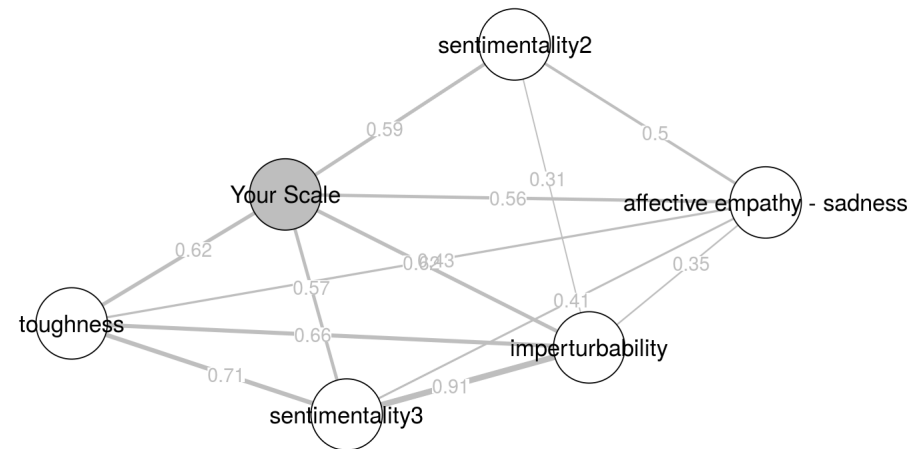

# Self-Attention – New: Public self-consciousness

| Scales                             | Similarity | Look up here                                                                                                           |
|------------------------------------|------------|------------------------------------------------------------------------------------------------------------------------|
| public self-consciousness          | 0.765      | <a href="http://ipip.ori.org/newSingleConstructsKey.htm">ipip.ori.org/newSingleConstructsKey.htm</a>                   |
| self-confidence                    | 0.627      | <a href="http://ipip.ori.org/newHPIKeys.htm">ipip.ori.org/newHPIKeys.htm</a>                                           |
| toughness2                         | 0.604      | <a href="http://ipip.ori.org/newHPIKeys.htm">ipip.ori.org/newHPIKeys.htm</a>                                           |
| severity of violence against men   | 0.586      | <a href="http://www.midss.org/">www.midss.org/</a>                                                                     |
| severity of violence against women | 0.586      | <a href="http://www.scalesandmeasures.net/scales_view.php?id=783">www.scalesandmeasures.net/scales_view.php?id=783</a> |

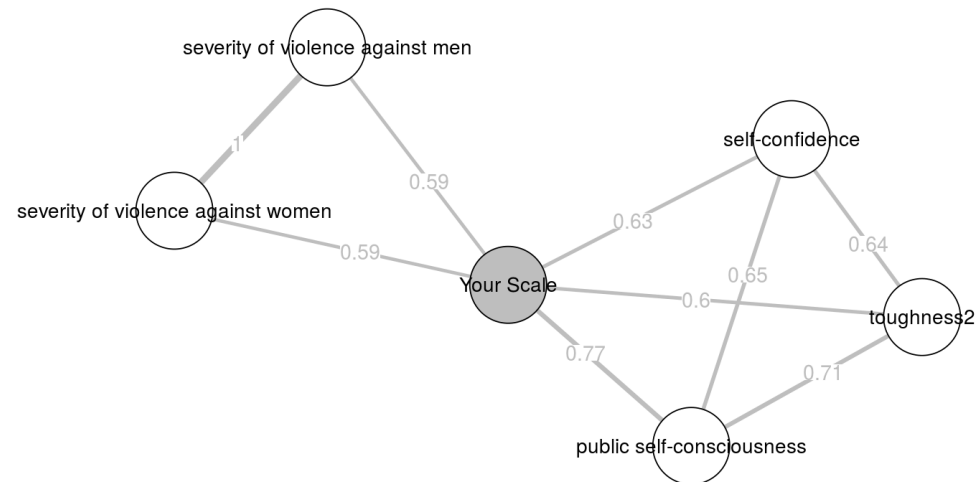

# Creativity

| Scales                    | Similarity | Look up here                                                                                                                                                                                                    |
|---------------------------|------------|-----------------------------------------------------------------------------------------------------------------------------------------------------------------------------------------------------------------|
| generate scenarios        | 0.516      | Taggart, W., & Valenzi, E. (1990). Assessing rational and intuitive styles: A human information processing metaphor. <i>Journal of Management Studies</i> , 27(2), 149-172.                                     |
| variety-seeking           | 0.514      | <a href="http://ipip.ori.org/newTCIKey.htm">ipip.ori.org/newTCIKey.htm</a>                                                                                                                                      |
| creative performance 1    | 0.502      | George, Jennifer M., and Jing Zhou (2002), Understanding When Bad Moods Foster Creativity and Good Ones Don't: The Role of Context and Clarity of Feelings, <i>Journal of Applied Psychology</i> , 87, 687-697. |
| ingenuity                 | 0.489      | <a href="http://ipip.ori.org/newJPIRKey.htm">ipip.ori.org/newJPIRKey.htm</a>                                                                                                                                    |
| individual innovativeness | 0.477      | <a href="http://www.midss.org/">www.midss.org/</a>                                                                                                                                                              |

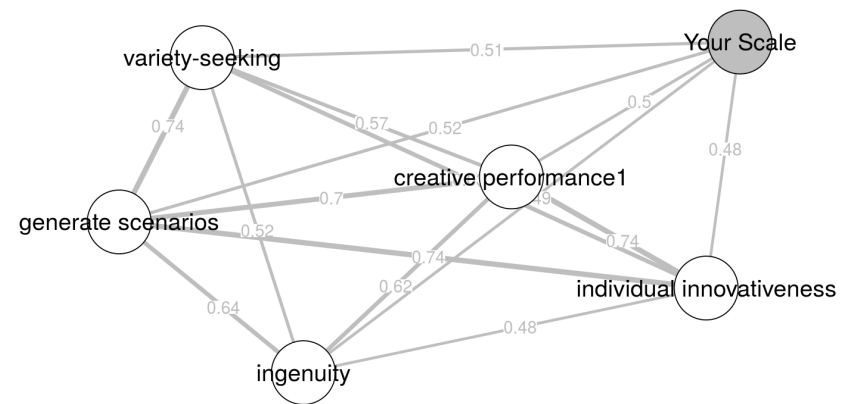

# Wish for variety – New: Adventurousness

| Scales                                                      | Similarity | Look up here                                                                                                                                                                                    |
|-------------------------------------------------------------|------------|-------------------------------------------------------------------------------------------------------------------------------------------------------------------------------------------------|
| adventurousness2                                            | 0.423      | <a href="http://ipop.ori.org/new6FPQKey.htm">ipop.ori.org/new6FPQKey.htm</a>                                                                                                                    |
| sexual harassment by clients and customers sexist hostility | 0.405      | Gettman, Hilary J. (2007), When the Customer Shouldn't Be King: Antecedents and Consequences of Sexual Harassment by Clients and Customers, <i>Journal of Applied Psychology</i> , 92, 757-770. |
| originality/creativity                                      | 0.397      | <a href="http://ipop.ori.org/newVIAKey.htm">ipop.ori.org/newVIAKey.htm</a>                                                                                                                      |
| dementia severity - orientation                             | 0.393      | <a href="http://www.scalesandmeasures.net/scales_view.php?id=4284">www.scalesandmeasures.net/scales_view.php?id=4284</a>                                                                        |
| variety-seeking                                             | 0.369      | <a href="http://ipop.ori.org/newTCIKey.htm">ipop.ori.org/newTCIKey.htm</a>                                                                                                                      |

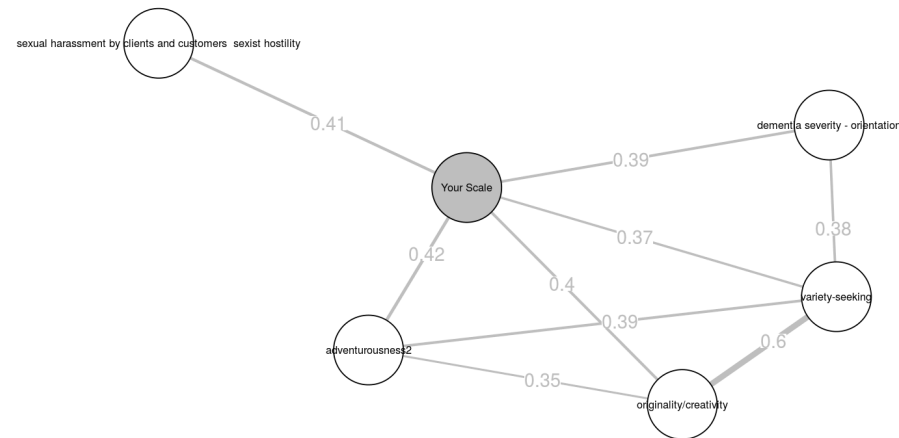

# Open-Mindedness

| Scales                                  | Similarity | Look up here                                                                                                                                                                             |
|-----------------------------------------|------------|------------------------------------------------------------------------------------------------------------------------------------------------------------------------------------------|
| evaluate view of father of grandchild   | 0.428      | Rempusheski, Veronica F., and Catherine T. O'Hara (2005), Psychometric Properties of the Grandparent Perceptions of Family Scale (GPFs), Nursing Research, 54, 419-427.                  |
| attitude toward the ad (receptiveness)  | 0.428      | Bruner, G. C. (2012). Marketing Scales Handbook : A Compilation of Multi-Item Measures for Consumer Behavior & Advertising Research, Volume 6. Fort Worth, Texas: GCBII Productions, LLC |
| self-disclosure attitudes/opinions      | 0.406      | (D.L.) Jourard, S. M., & Lasakow, P. (1958). Some factors in self-disclosure. The Journal of Abnormal and Social Psychology, 56(1), 91.                                                  |
| tolerance of muslims                    | 0.357      | <a href="http://www.thearda.com/MaWizard/scales/">www.thearda.com/MaWizard/scales/</a>                                                                                                   |
| evaluative view of mother of grandchild | 0.347      | Rempusheski, Veronica F., and Catherine T. O'Hara (2005), Psychometric Properties of the Grandparent Perceptions of Family Scale (GPFs), Nursing Research, 54, 419-427.                  |

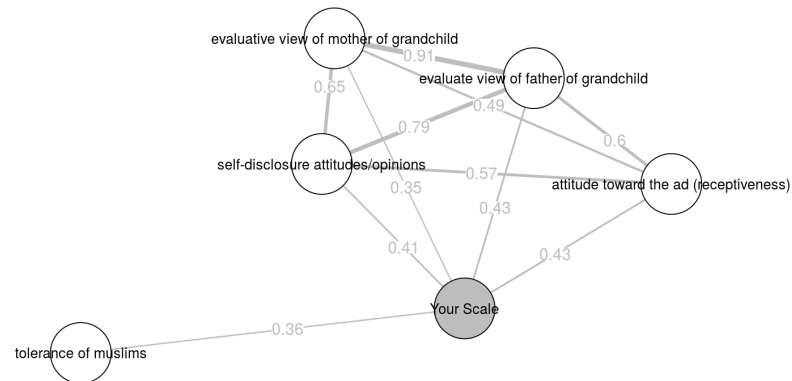

# Interest in reading

| Scales             | Similarity | Look up here                                                                                                                                                             |
|--------------------|------------|--------------------------------------------------------------------------------------------------------------------------------------------------------------------------|
| reading motivation | 0.907      | Schutte, N. S., & Malouff, J. M. (2007). Dimensions of reading motivation: Development of an adult reading motivation scale. <i>Reading Psychology</i> , 28(5), 469-489. |
| reading2           | 0.872      | <a href="http://pip.ori.org/newHPIKeys.htm">pip.ori.org/newHPIKeys.htm</a>                                                                                               |
| reading            | 0.82       | <a href="http://pip.ori.org/newORAISKey.htm">pip.ori.org/newORAISKey.htm</a>                                                                                             |
| comprehension      | 0.789      | <a href="http://pip.ori.org/new6FPQKey.htm">pip.ori.org/new6FPQKey.htm</a>                                                                                               |
| comprehension2     | 0.778      | <a href="http://pip.ori.org/newCPIKey.htm">pip.ori.org/newCPIKey.htm</a>                                                                                                 |

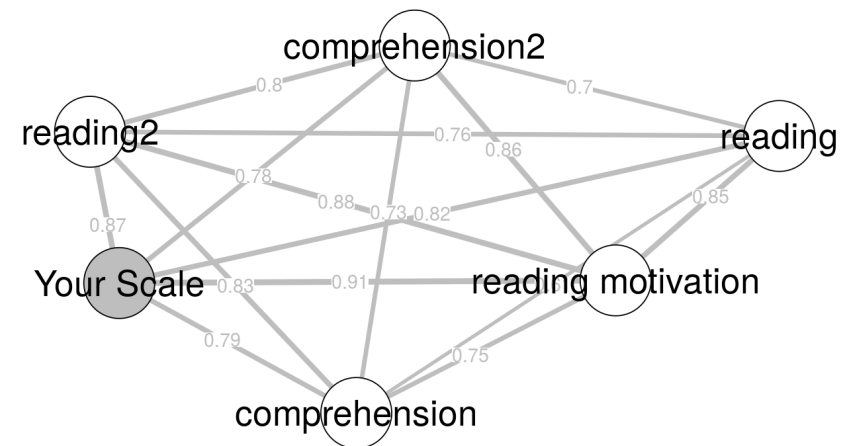

# Aesthetics – New: Culture

| Scales                      | Similarity | Look up here                                                                                                                                                                                |
|-----------------------------|------------|---------------------------------------------------------------------------------------------------------------------------------------------------------------------------------------------|
| verbal anxiety              | 0.855      | Skaalvik, Einar M. (1995), A Test of Internal/External Frame of Reference Model at Different Levels of Math and Verbal Self-Perception, American Educational Research Journal, 32, 161-184. |
| verbal intrinsic motivation | 0.838      | Skaalvik, Einar M. (1995), A Test of Internal/External Frame of Reference Model at Different Levels of Math and Verbal Self-Perception, American Educational Research Journal, 32, 161-184. |
| verbal effort               | 0.83       | Skaalvik, Einar M. (1995), A Test of Internal/External Frame of Reference Model at Different Levels of Math and Verbal Self-Perception, American Educational Research Journal, 32, 161-184. |
| culture2                    | 0.732      | <a href="http://ipop.ori.org/newHPIKeys.htm">ipop.ori.org/newHPIKeys.htm</a>                                                                                                                |
| artistic interests          | 0.691      | <a href="http://ipop.ori.org/newNEOKey.htm">ipop.ori.org/newNEOKey.htm</a>                                                                                                                  |

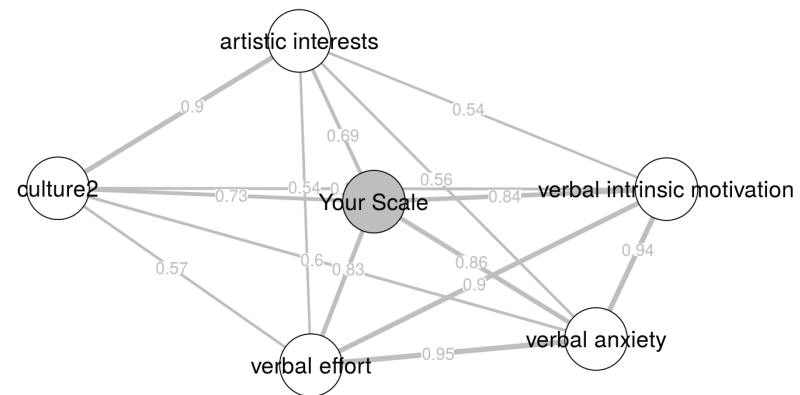

# Wish to analyze – New: Curiosity

| Scales        | Similarity | Look up here                                                                                     |
|---------------|------------|--------------------------------------------------------------------------------------------------|
| curiosity2    | 0.522      | <a href="http://ipip.ori.org/newHPIKeys.htm">ipip.ori.org/newHPIKeys.htm</a>                     |
| depth2        | 0.513      | <a href="http://ipip.ori.org/newAB5CKey.htm">ipip.ori.org/newAB5CKey.htm</a>                     |
| risk taking   | 0.453      | <a href="http://ipip.ori.org/newCAT-PD-SFv1.1Keys.htm">ipip.ori.org/newCAT-PD-SFv1.1Keys.htm</a> |
| dirty dozen p | 0.452      | <a href="http://openpsychometrics.org/_rawdata/">openpsychometrics.org/_rawdata/</a>             |
| quickness     | 0.444      | <a href="http://ipip.ori.org/newAB5CKey.htm">ipip.ori.org/newAB5CKey.htm</a>                     |

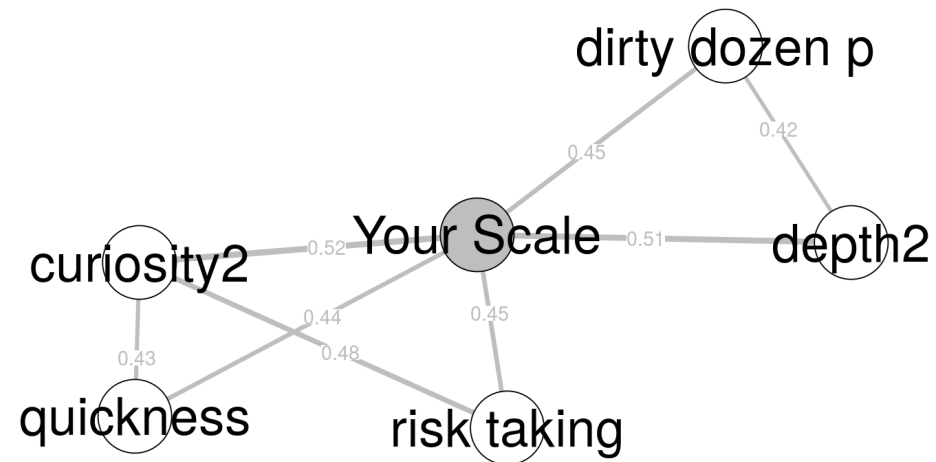



# Willingness to learn

| Scales                                       | Similarity | Look up here                                                                                                                                                                                                                   |
|----------------------------------------------|------------|--------------------------------------------------------------------------------------------------------------------------------------------------------------------------------------------------------------------------------|
| self efficacy for academic achievement scale | 0.706      | Zimmerman, Barry J. (1992), Self-Motivation for Academic Attainment: The Role of Self-Efficacy Beliefs and Personal Goal Setting, American Educational Research Journal, 29, 663-676.                                          |
| learning goal orientation                    | 0.609      | VandeWalle, Don (1999), The Influence of Goal Orientation and Self-Regulation Tactics on Sales Performance: A Longitudinal Field Test , Journal of Applied Psychology, 84, 249-259 .                                           |
| affinity for technology                      | 0.576      |                                                                                                                                                                                                                                |
| subjective motivational experience           | 0.563      | Hickey, Daniel T. (2001), The Motivational and Academic Consequences of elementary Mathematics Environments: Do Constructivist Innovations and Reforms Make a Difference?, American Educational Research Journal, 38, 611-652. |
| creating and conceptualizing                 | 0.506      | Bartram, Dave (2005), The Great Eight Competencies: A Criterion-Centric Approach to Validation, Journal of Applied Psychology, 90, 1185-1203.                                                                                  |

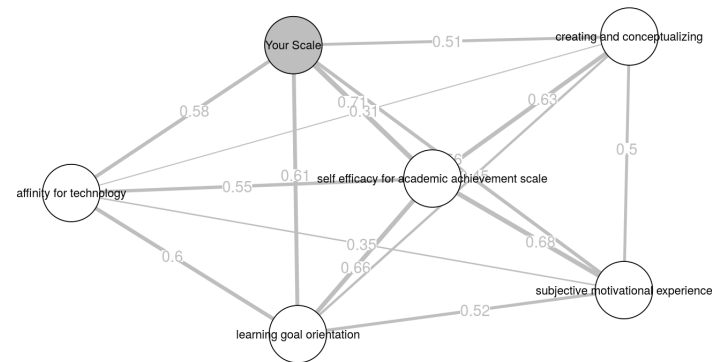

# Sensitivity – New: Empathy

| Scales                                                 | Similarity | Look up here                                                                                                                                                                                                                |
|--------------------------------------------------------|------------|-----------------------------------------------------------------------------------------------------------------------------------------------------------------------------------------------------------------------------|
| emotionality                                           | 0.705      | <a href="http://ipop.ori.org/newNEOKey.htm">ipop.ori.org/newNEOKey.htm</a>                                                                                                                                                  |
| other-emotion appraisal                                | 0.656      | Wong, C. S., & Law, K. S. (2002). The effects of leader and follower emotional intelligence on performance and attitude: An exploratory study. <i>The leadership quarterly</i> , 13(3), 243-274.                            |
| empathy3                                               | 0.564      | <a href="http://ipop.ori.org/newJPI-RKey.htm">ipop.ori.org/newJPI-RKey.htm</a>                                                                                                                                              |
| emotion reactivity                                     | 0.56       | Nock, M. K., Wedig, M. M., Holmberg, E. B., & Hooley, J. M. (2008). The emotion reactivity scale: development, evaluation, and relation to self-injurious thoughts and behaviors. <i>Behavior therapy</i> , 39(2), 107-116. |
| differentiation of self one's own emotional reactivity | 0.559      | Knauth, Donna, and Elizabeth Skowron (2004). Psychometric Evaluation of the Differentiation of Self Inventory for Adolescents, <i>Nursing Research</i> , 53, 163-171.                                                       |

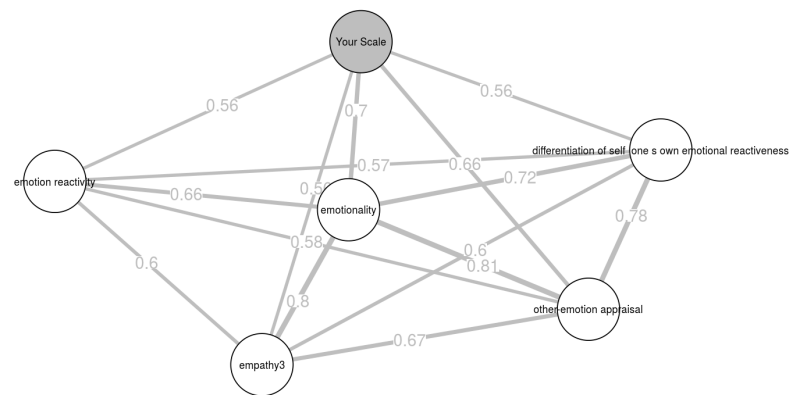

# Intellect

| Scales      | Similarity | Look up here                                                                 |
|-------------|------------|------------------------------------------------------------------------------|
| intellect3  | 0.604      | <a href="http://ipop.ori.org/BFASKeys.htm">ipop.ori.org/BFASKeys.htm</a>     |
| education   | 0.575      | <a href="http://ipop.ori.org/newHPIKeys.htm">ipop.ori.org/newHPIKeys.htm</a> |
| quickness   | 0.541      | <a href="http://ipop.ori.org/newAB5CKey.htm">ipop.ori.org/newAB5CKey.htm</a> |
| good memory | 0.525      | <a href="http://ipop.ori.org/newHPIKeys.htm">ipop.ori.org/newHPIKeys.htm</a> |
| quickness2  | 0.513      | <a href="http://ipop.ori.org/newHPIKeys.htm">ipop.ori.org/newHPIKeys.htm</a> |

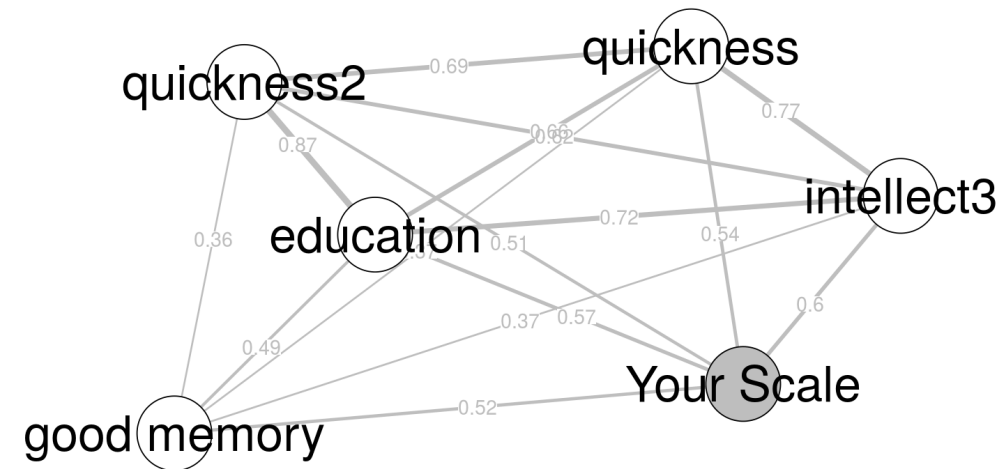

Supplement: 2698-1866_a000021_esm2.pdf [file 2698-1866_a000021_esm2.pdf]
